# Supplementary material
Source: ML conference proceedings conference paper supplement (https://openaccess.thecvf.com/content/CVPR2023/html/Liu_MMVC_Learned_Multi-Mode_CVPR_2023_paper.html)
Supplement: Supplementary file 1 [file Liu_MMVC_Learned_Multi-Mode_CVPR_2023_supplemental.pdf]

# MMVC: Learned Multi-Mode Video Compression with Block-based Prediction Mode Selection and Density-Adaptive Entropy Coding

Bowen Liu, Yu Chen,\* Rakesh Chowdary Machineni,\* Shiyu Liu, Hun-Seok Kim  
University of Michigan, Ann Arbor

{bowenliu, unchenyu, mrakeshc, shiyuliu, hunseok}@umich.edu

This supplementary material provides additional information for our proposed MMVC scheme, including the network architectures, experimental settings, additional qualitative results, and an additional study on the impact of block partitioning. To help understanding the overall datapath of MMVC, a simpler overview diagram is provided to supplement the detailed datapath figure available in the main manuscript.

## 1. Model Architecture

The detailed architecture of our encoder  $E(\cdot)$ , decoder  $D(\cdot)$  and predictor networks  $P^{\text{OFC}}(\cdot)$  and  $P^{\text{FP}}(\cdot)$  are presented in Figure 1, 2, 3, and 4.

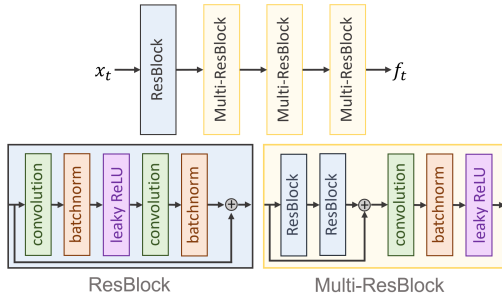

Figure 1. Encoder network structure.

### 1.1. Feature Encoder

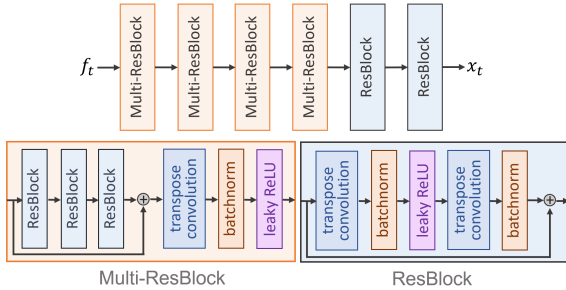

Figure 2. Decoder network structure.

\*Equally contributed authors.

The architecture of our encoder  $E(\cdot)$  is shown in Figure 1. We use  $5 \times 5$  2D convolutional layers in ResBlock at the first few layers, and we use  $3 \times 3$  conv layers for Multi-ResBlocks layers. The first ResBlock has 64 output channels, while the others have 96 output channels. The conv layer in Multi-ResBlock outside of the residual connection has a stride of 2.

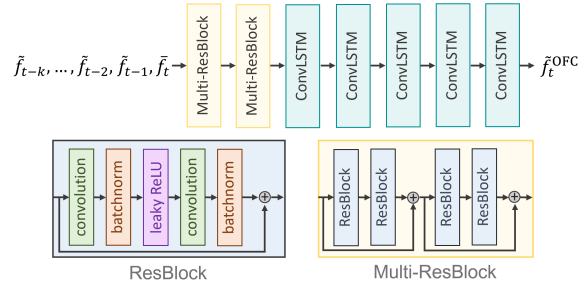

Figure 3. Optical Flow Conditioned Prediction network structure.

### 1.2. Feature Decoder

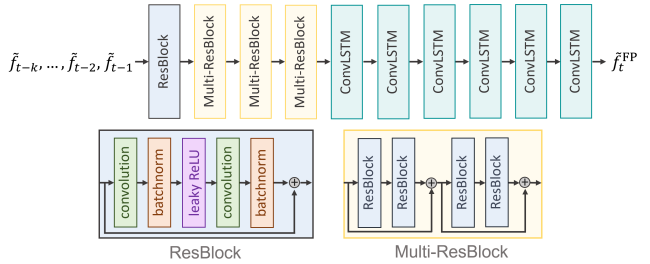

Figure 4. Feature Prediction network structure.

Figure 2 depicts the architecture of the decoder network  $D(\cdot)$ . All transpose conv layers have  $3 \times 3$  kernels except for the last two ResBlocks. The first three Multi-ResBlocks have 96 output channels, and we reduce this number to 64, 32, and 3 respectively for the remaining Multi-ResBlocks and ResBlocks. The transpose conv layer in Multi-ResBlock outside of the residual connection has a stride of 2.



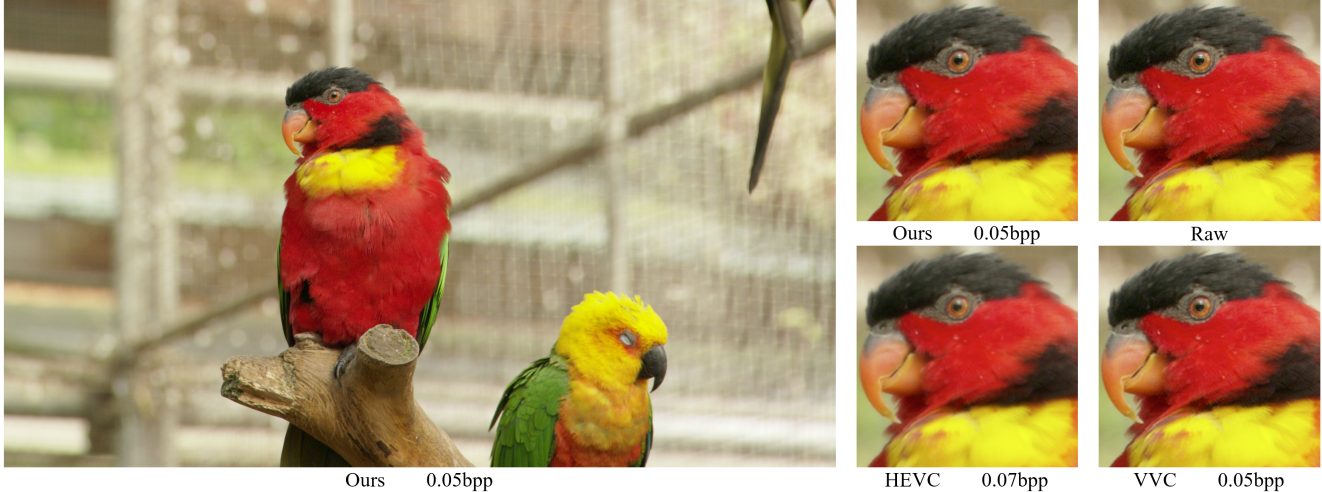

Figure 6. Visualization of a frame from the MCL-JCV dataset. Here we compare our reconstruction with results obtained from the conventional standards, and also with the raw frame.

## 5. Subjective Quality Study

In Figure 6 we visualize a compressed frame from the MCL-JCV dataset. For reference, we compare our result with reconstructions from HEVC and VVC, along with the raw frame. Compared with these conventional codecs, our proposed MMVC can better preserve details around the parrot’s eye and texture of the feathers in our reconstruction with similar or lower bitrate.

Table 1. The block size vs. bitrate comparison for different block partition strategies. We set  $k = 16$  as the anchor baseline. Numbers indicate the increased bitrate percentage under similar quality.

| Partitioning  | UVG   | MCL-JCV | Kinetics |
|---------------|-------|---------|----------|
| <b>k = 8</b>  | 21.5% | 25.6%   | 76.9%    |
| <b>k = 16</b> | 0%    | 0%      | 0%       |
| <b>k = 32</b> | 11.8% | 13.9%   | 50.2%    |
| <b>k = 64</b> | 39.7% | 46.9%   | 138.6%   |

We visualize the (pixel domain) residuals between previous / warped / (decoded) predicted / reconstructed frame and the current frame at time  $t$  in Figure 7. All sub-figures share the same color bar and scale, where darker color implies lower magnitude, and lighter color indicates higher magnitude. By this example, we observe that the optical flow predicts static motions reasonably well, serving as a useful condition in the following prediction stage. Moreover, with the ensemble of the best prediction path in each block, we are able to get sparse residuals and small reconstruction (quantization) errors.

## 6. Study on Block Partitioning

In our implementation, we set  $k = 16$  to partition each frame or feature representation to  $16 \times 16$  blocks. Notice that  $k$  does not change with the input frame size. It implies that an input of higher resolution results in larger blocks. To show the impact of different block partitioning method, we experimented with  $k = 8, 16, 32, 64$  on different datasets and measured the  $k$  vs. bitrate performance as summarized in Table 1. All tests with  $k = 16$  achieve the best performance (lowest bitrate), thus we use  $k = 16$  as the baseline for this evaluation. For smaller  $k$  values (larger blocks), the likelihood of observing unchanged blocks decreases, reducing the utilization of the *Skip Mode* and therefore degrading the overall performance. Larger  $k$  values (smaller blocks) leads to higher chances of activating the *Skip Mode*. However, this strategy needs more bits to store the mode selection map, diminishing the benefits of using the sparse entropy coding path more often given that run-length coding has to operate with smaller windows. Therefore, having a proper partitioning strategy in our scheme is a key to reach to a balanced position in this trade-off.

## 7. Future Work

The proposed MMVC framework demonstrates the significant benefit of having multiple specialized models and datapath modes that are fine-tuned for certain contexts in the video. A possible future research is to learn a ‘unified adaptive mode’ that can automatically apply different (implicit) modes to each block of the frame. An automatic (learning-based) mode selection / adaptation is a future research topic to eliminate the overhead of evaluating all modes as in our MMVC framework. Replacing the arithmetic coding in

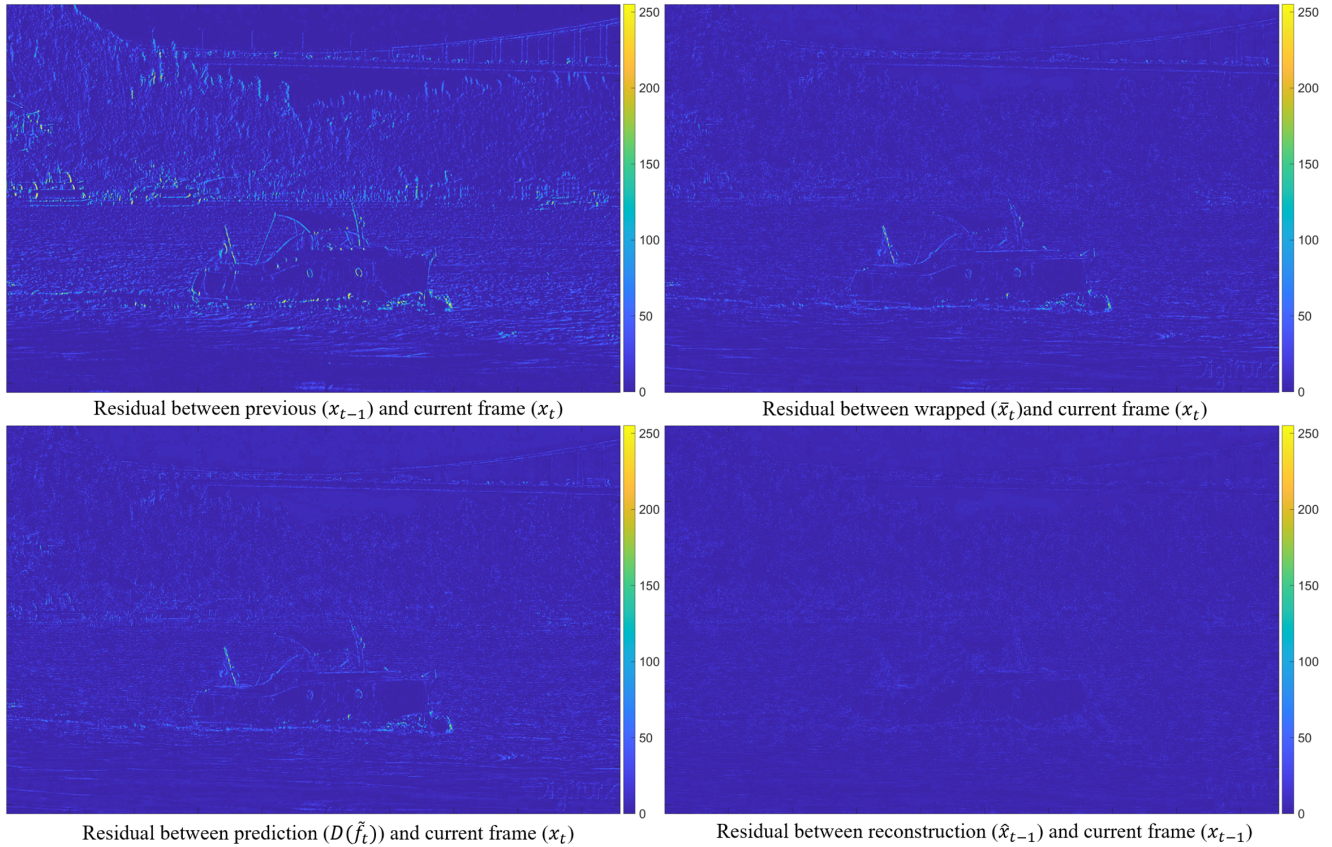

Figure 7. Visualization of residuals between previous / optical flow warped / predicted / reconstructed frame and current frame in the pixel domain. The result is presented as a heatmap, where the blue color indicates a small difference between the prediction and raw frame.

MMVC (for FP mode) to a ‘learned’ entropy coding model is another promising future work.

## References

- [1] Zhihao Hu, Guo Lu, and Dong Xu. Fvc: A new framework towards deep video compression in feature space. In *Proceedings of the IEEE/CVF Conference on Computer Vision and Pattern Recognition (CVPR)*, pages 1502–1511, June 2021. 2
- [2] Jiahao Li, Bin Li, and Yan Lu. Deep contextual video compression. In A. Beygelzimer, Y. Dauphin, P. Liang, and J. Wortman Vaughan, editors, *Advances in Neural Information Processing Systems*, 2021. 2
